# Supplementary material for: Promotional effect of doping SnO2 into TiO2 over a CeO2/TiO2 catalyst for selective catalytic reduction of NO by NH3
Source: Royal Society of Chemistry journal article supplement (doi:10.1039/c4cy01412j), 2015-01-01
Supplement: c4cy01412j1.pdf [file c4cy01412j1.pdf]

## **Supplementary Information**

Promotional effect of doping SnO<sub>2</sub> into TiO<sub>2</sub> over CeO<sub>2</sub>/TiO<sub>2</sub> catalyst for  
the selective catalytic reduction of NO by NH<sub>3</sub>

Lei Zhang<sup>a</sup>, Lulu Li<sup>a</sup>, Yuan Cao<sup>a</sup>, Yan Xiong<sup>a</sup>, Shiguo Wu<sup>a</sup>, Jingsun Sun<sup>b</sup>, Changjin Tang<sup>a\*</sup>, Fei  
Gao<sup>b</sup>, Lin Dong<sup>a,b\*</sup>

<sup>a</sup> Key Laboratory of Mesoscopic Chemistry of MOE, School of Chemistry and Chemical  
Engineering, Nanjing University, Nanjing 210093, PR China

<sup>b</sup>Jiangsu Key Laboratory of Vehicle Emissions Control, Center of Modern Analysis, Nanjing  
University, Nanjing 210093, PR China

**\* To whom correspondence should be addressed.**

**E-mail: [tangcj@nju.edu.cn](mailto:tangcj@nju.edu.cn), [donglin@nju.edu.cn](mailto:donglin@nju.edu.cn) Tel: +86-25-83592290 Fax: +86-**

**25-83317761**

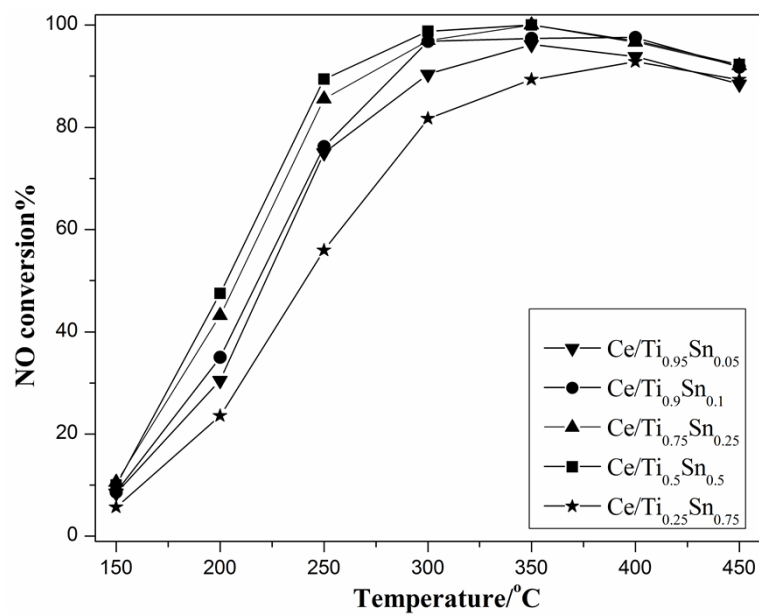

Fig. S1 NO conversion of Ce/Ti<sub>x</sub>Sn<sub>1-x</sub> samples with different molar ratios of Ti/Sn. Reaction conditions: 500 ppm NO, 500 ppm NH<sub>3</sub>, 5 vol.% O<sub>2</sub>, GHSV=90,000 h<sup>-1</sup>.

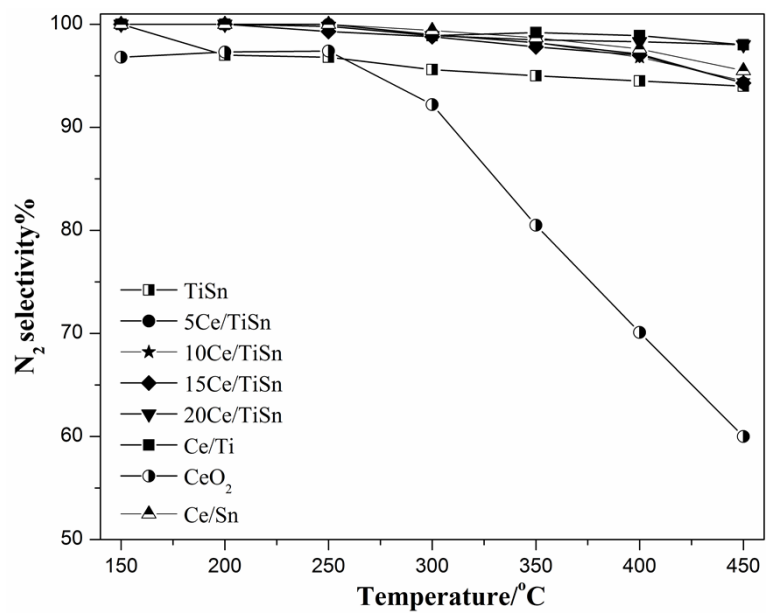

Fig. S2. N<sub>2</sub> selectivity of CeO<sub>2</sub>, Tin, Ce/Sn, Ce/Ti, and Ce/TiSn samples. Reaction conditions: 500 ppm NO, 500 ppm NH<sub>3</sub>, 5 vol.% O<sub>2</sub>, GHSV=90,000 h<sup>-1</sup>.

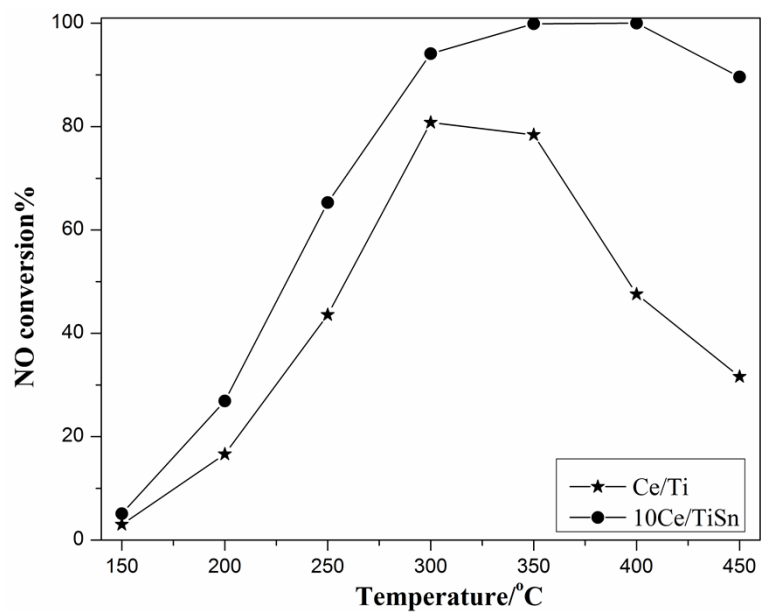

Fig. S3. NO conversion of Ce/Ti and Ce/TiSn aged at 750 °C for 4 h. Reaction conditions: 500 ppm NO, 500 ppm NH<sub>3</sub>, 5 vol.% O<sub>2</sub>, GHSV=90,000 h<sup>-1</sup>.

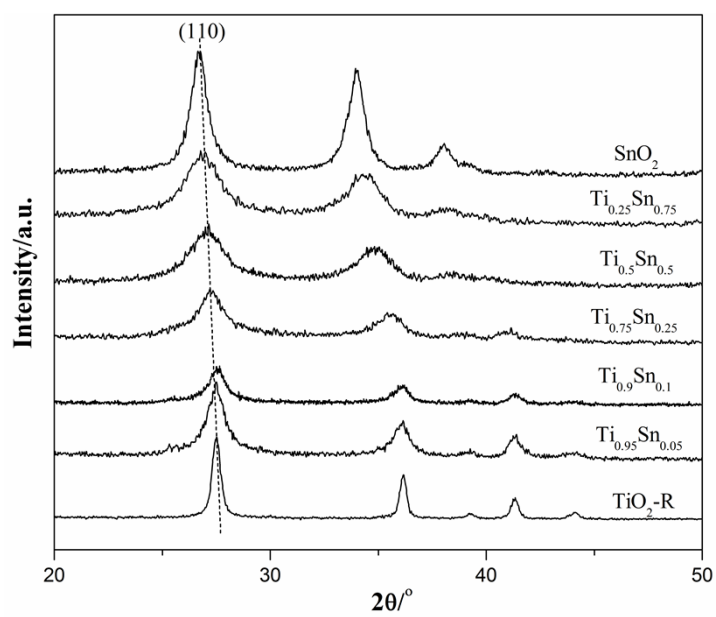

Fig. S4. XRD patterns of  $\text{Ti}_x\text{Sn}_{1-x}$  supports ( $x=0-1$ ).

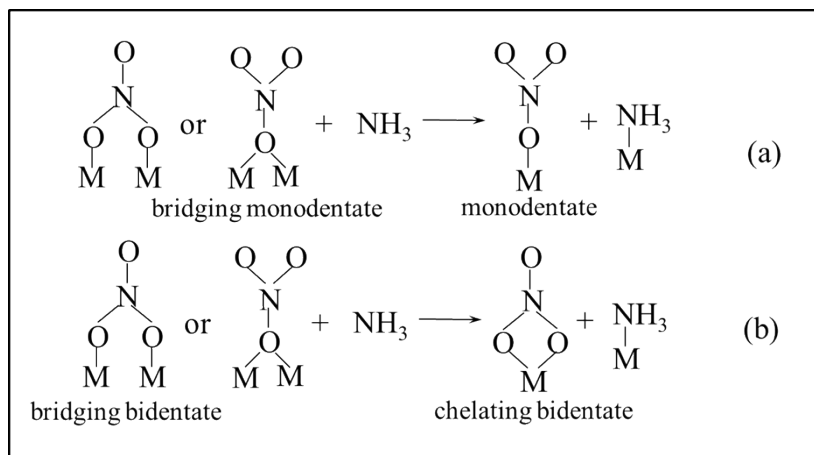

Fig. S5. Competition adsorption model between NH<sub>3</sub> and bridging nitrates.
